# Supplementary material for: Low-dose chloroquine treatment extends the lifespan of aged rats
Source: PubMed Central journal article supplement (PMC9095792; doi:10.1007/s13238-021-00903-1), 2022-01-12

## **Supplemental Materials**

### **Materials and Methods**

#### **Cell culture**

WS hMSCs (Werner syndrome hMSCs) were cultured on a gelatin-coated plate (Zhang et al., 2015; Wu et al., 2018). The hMSC medium contains  $\alpha$ -MEM medium, supplemented with 10% fetal bovine serum (FBS, Gibco), 0.1 mM non-essential amino acids (NEAA, Gibco), 1% penicillin/streptomycin (Gibco), and 1 ng/mL bFGF (Joint Protein Central). WS hMSCs were seeded in 6-well plates at a density of  $8 \times 10^4$  cells and in 96-well plates at a density of 2500 cells per well. After a 24 h culturing period, CQ (Sigma, C6628) (0.2  $\mu$ mol/L, 1  $\mu$ mol/L, 5  $\mu$ mol/L, 20  $\mu$ mol/L, 100  $\mu$ mol/L) was added to the medium. No mycoplasma contamination was detected in the cell culture.

#### **Drug treatment**

All animal experiments were performed in accordance with the protocol approved by the Animal Care and Use Committee of the Chinese Academy of Sciences. Wild-type SD rats were individually reared in a pathogen-free facility at a controlled temperature (23-24°C), under a 12 h light and dark cycle with food and water provided *ad libitum*. The cage and bedding were changed once a week. For CQ treatment, rats were treated at 0.1 mg of CQ per kilogram of body weight. Before the experiment, the lowest water intake of the rats was measured to ensure that the given drug was consumed by the rat. Accordingly, CQ (0.1 mg/kg) was dissolved in 3 mL of water and given to each rat at 8:00 am on the day of administration. Only after having finished the 3 mL water with CQ in the bottle, the rats were then provided drinking water *ad libitum*. Male SD rats (24-month-old) were treated with CQ twice per week for five months. Water was provided to the old control group starting from 24-month-old in the same way without CQ. In addition, 2-month-old young rats were taken as young controls. Body weight and blood glucose of the rats were measured monthly. After 5 months of CQ treatment, rats were tested in a metabolic cage and by cardiac echocardiography and samples were collected for further analyses. Male SD rats were treated with CQ twice per week until the death in the lifespan experiment.

#### **Metabolic cage detection**

Metabolism cage detection was performed with rats treated with CQ or water (control) as

previously described (Campos et al., 2017; Dodd et al., 2017) by Promethion Small Animal Metabolism Measurement and Analysis System (Sable Systems). The macro interpreter program was used to convert the recorded data file format into excel files after the experiment for further statistical analyses.

### **Routine blood analysis**

Blood biochemistry in freshly collected whole blood of rats was tested using the hematology analyzer (Shenzhen Mindray BC-5180CRP). The experiment was carried out in accordance with the manufacturer's instructions.

### **Liver function test**

Blood biochemistry in the plasma of rats was performed using the fully automatic bio analysis machine (Toshiba, TBA-120FR), and then subjected to several tests by using the kits listed below. ALT (Beijing XinChuangYuan Biotech, B2008) and TBiL (Beijing XinChuangYuan Biotech, B2081) were measured following the manufacturer's instructions.

### **Assessment of cardiac function**

The cardiac function was evaluated through transthoracic echocardiography by Vevo 2100 imaging system (Visual Sonics, Inc.) with a 30-MHz transducer. The mice were anesthetized via the inhalation of 2% isoflurane and then tested. The two-dimensional M-mode trace of each rat was obtained at the level of the papillary muscle. Left ventricular ejection fraction (EF), fractional shortening (FS) and E/A ratios were measured and calculated on three consecutive cardiac cycles.

### **Enzyme-linked immunosorbent assay (ELISA)**

Pro-inflammatory cytokine levels in the plasma of rats were tested by enzyme-linked immunosorbent assay (ELISA, bioscience). IL-6 (Thermo, 88-50625), TNF- $\alpha$  (Thermo, 88-7340), MCP-1 (Thermo, BMS631), IL-1 $\beta$  (Thermo, 88-6010) and IL-7 (Thermo, ERA33RB) were tested in accordance with the manufacturer's instructions. The results were quantified using a microplate reader (Thermo, MK3). IL-6 levels in the cell supernatant of WS hMSCs were measured by a commercially available ELISA kit (Biolegend, 430504) according to the manufacturer's instructions.

### **Preparation of paraffin sections and frozen sections**

Paraffin embedding and frozen sectioning were conducted as previously described (Ma et al., 2020). For paraffin-embedded sections, fresh rat kidney, lung, liver, heart, aorta, and small intestine samples were collected and immersed in 4% paraformaldehyde (PFA) at 4°C overnight. The samples were then dehydrated with gradient alcohol, embedded in paraffin, and cut into 5- $\mu$ m sections using the rotary microtome HM325 (MICROM International). For frozen sections, rat samples were embedded in an optimal cutting temperature (OCT) compound (Sakura Finetek, 4583), embedded at room temperature for 15 min, quickly frozen in liquid nitrogen, and then stored at -80°C. ACM 1850 cryostat (Leica Microsystems Nussloch) was used to cut the frozen samples into 10- $\mu$ m sections and stored at -80°C.

### **Immunofluorescence staining**

Immunofluorescence microscopy was performed as previously described (Ma et al., 2020). For tissues, paraffin-embedded sections of rat tissue samples were routinely deparaffinized to water, and antigen retrieval was performed by boiling in sodium citrate buffer (pH = 6.0) for 15 min. After cooling down to room temperature, the sections were blocked with 5% donkey serum in PBS for 1 h at room temperature. After washing, samples were incubated with the primary antibody Anti-CD68 (Abcam, ab213363) in blocking buffer at 4°C overnight. The next day, the appropriate fluorescently labeled secondary antibody was added. Sections were subsequently counterstained with Hoechst 33342 (Thermo Fisher Scientific). The image was taken using a Zeiss LSM900 laser scanning confocal microscope, and statistical data were calculated and analyzed using ImageJ.

For cells, samples were seeded on microscope coverslips for 24 h before the staining. After being washed with PBS twice, cell slides were fixed with 4% paraformaldehyde in PBS for 15 min. Later, they were washed with PBS three times, followed by cell permeabilization with 0.3% Triton X-100 in PBS for 20 min. Blocking buffer (5% donkey serum in PBS) was then applied before the incubation with appropriate primary antibody (anti-Ki67 (Abcam, ab16667), anti-H3K9me3 (Abcam, ab8898), anti-HP1 $\gamma$  (CST, 2619S) or anti-LAP2 (Abcam, ab5162)) in blocking buffer at 4°C overnight followed by the incubation with appropriate fluorescently labeled secondary antibody and Hoechst 33342. All the images were obtained using a Zeiss LSM900 laser scanning confocal microscope.

### **Aggresome staining**

For analysis of aggresome intensity, frozen sections were stained with PROTEOSTAT®

aggresome detection kit (ENZO, ENZ-51035-K100). Briefly, sections were fixed using 4% PFA in PBS for 15 min, permeabilized with 0.3% Triton X-100 (Sigma, T9284) in PBS for 7 min, incubated with the aggresome dye (1:2000 dilution in PBS) for 3 min, and destained in 1% acetic acid for 20 min. After washing thoroughly with PBS, sections were subsequently counterstained with Hoechst 33342 (Thermo Fisher Scientific). The image was taken using a Zeiss LSM900 laser scanning confocal microscope and statistical data were calculated and analyzed using ImageJ.

### **Hematoxylin and eosin (H&E) staining**

Paraffin-embedded sections were routinely deparaffinized in water and incubated with hematoxylin (Servicebio, China) at room temperature for 5 min, followed by treatment with 1% acidic alcohol for less than 10 sec as appropriate. Next, slides were washed in running tap water and then stained with eosin. The sections were dehydrated through 80%, 90% and 100% alcohol, and cleared by xylene. Slides were covered with coverslips and images were taken for quantitative analysis.

### **Masson's trichrome staining**

Masson's trichrome staining (Solarbio, G1346) was performed according to the protocol. The paraffin-embedded sections of the tested tissues were deparaffinized using xylene and rehydrated with 100% alcohol, 95% alcohol, 70% alcohol, and running tap water. Sections were then stained according to the manufacturer's protocol. The image was taken using the slice scanner (Leica, CS2) for quantitative analysis.

### **SA- $\beta$ -gal staining**

SA- $\beta$ -gal staining was conducted as previously described (Cai et al., 2020). For tissues, frozen sections were warmed up to room temperature, washed with PBS, and fixed with 2% formaldehyde and 0.2% glutaraldehyde at room temperature for 15 min. Tissue sections were then stained with freshly prepared 1 mg/mL of X-gal solution (Ameresco) at 37°C for 4-12 h, depending on the tissue type. For cells, cells were seeded on 6-well plates for 24 h before staining. After being washed by PBS twice, cell slides were fixed with 2% formaldehyde and 0.2% glutaraldehyde at room temperature for 4 min. After washing with PBS for three times, the samples were stained in freshly prepared 1 mg/mL of X-gal solution at 37°C overnight. Images were collected under a microscope and the percentages of SA- $\beta$ -gal-positive areas and cells were quantified using ImageJ.

## **RT-qPCR**

Total RNAs from different tissues were extracted by TRIzol (Gibco, 15596018,) and converted to cDNA using GoScript Reverse Transcription System (Promega, A5001). RT-qPCR was performed using SYBR qPCR mix (TOYOBO, QPS-201) on a CFX384-Real-time system (Bio-Rad). *Actin* was used as an internal control to normalize the expression of target genes. Primers used for RT-qPCR are listed in the Table S1.

## **RNA sequencing**

An equal amount of extracted RNAs from each rat of the same group was mixed and then was applied for RNA sequencing with three technical replicates. Although this mixed procedure may cover the heterogeneity between rats, this method helps to identify key transcriptome changes between groups. Transcriptome library construction was performed with NEBNext Ultra™ Directional RNA Library Prep Kit (NEB, USA). The generated library was sequenced on an Illumina platform by the Novogene Bioinformatics Technology.

## **RNA-seq data processing**

Raw data were trimmed with Trim Galore software (version 0.4.5) (<https://github.com/FelixKrueger/TrimGalore>) to remove low-quality reads and reads with adaptors. The cleaned reads were then mapped to the UCSC rat reference genome (rn6) using HISAT2 (version 2.2.1) (Kim et al., 2015). Expression levels for each annotated gene were calculated by HTSeq (version 0.12.4) (Anders et al., 2015). Differentially expressed genes (DEGs) were calculated using DESeq2 package (version 1.30.0) (Love et al., 2014) with the cutoff of Benjamin-Hochberg adjusted  $P$ -value  $< 0.05$  and  $|\log_2(\text{fold change})| > 0.5$ . GO term and pathway enrichment analysis was performed using Metascape (<http://metascape.org>) (Zhou et al., 2019). Gene set enrichment analysis was conducted using GSEA (version 4.1.0) with default parameters (Subramanian et al., 2007). The aging-related genes were downloaded from the Aging Atlas database (<https://bigd.big.ac.cn/aging/index>) and the specific disease-associated genes were obtained from DisGeNET (<https://www.disgenet.org>) and MalaCards (<https://www.malacards.org>). All the sequencing data are deposited in Genome Sequence Archive (GSA) (<https://bigd.big.ac.cn/gsa/>) with the accession number of CRA004738.

## **Statistical analysis**

Data are presented as means  $\pm$  SEM. Statistical analyses were performed using GraphPad Prism

(v8) with the unpaired Student's  $t$ -test with post-hoc test or Log-rank test as appropriate.  $P$ -values less than 0.05 were considered statistically significant.

## Supplemental Figure Legends

### Figure S1. Functional analyses of aging and CQ-treated rats.

(A) Immunostaining of H3K9me3, HP1 $\gamma$  and LAP2 in CQ-treated and control WS hMSCs. Scale bar, 25  $\mu$ m. White arrows indicate the cells with decreased H3K9me3, HP1 $\gamma$  and LAP2 expression. Data are shown as means  $\pm$  SEM.  $n > 300$  cells from three biological replicates (unpaired Student's  $t$ -test). (B) ELISA of IL-6, MCP-1, IL-7 and IL-1 $\beta$  in the plasma of Y-Ctrl, O-Ctrl and O-CQ rats. The data are shown as means  $\pm$  SEM.  $n = 5$  rats per group (unpaired Student's  $t$ -test). IL, interleukin; MCP-1, monocyte chemoattractant protein-1. (C) Monthly monitoring of body weight (g) and blood glucose concentration (mmol/L) of O-Ctrl and O-CQ rats during CQ treatment. The data are shown as means  $\pm$  SEM.  $n = 5$  rats per group (unpaired Student's  $t$ -test). (D) Organ weights of brain, heart, liver, lung and kidney in Y-Ctrl, O-Ctrl and O-CQ rats. The data are shown as means  $\pm$  SEM.  $n = 5$  rats per group (unpaired Student's  $t$ -test). (E) The tissue index (tissue weight divided by body weight) of heart, liver, lung and kidney of Y-Ctrl, O-Ctrl and O-CQ rats. The data are shown as means  $\pm$  SEM.  $n = 5$  rats per group (unpaired Student's  $t$ -test).

### Figure S2. Morphological analyses of aging and CQ-treated rats.

(A) H&E staining of kidney, small intestine, heart and aorta tissues. Scale bars, 50  $\mu$ m for kidney and heart, 200  $\mu$ m for small intestine and 200  $\mu$ m for aorta. The yellow line indicates the edge of the glomerulus in the kidney tissue, the length of the intestinal villi in the intestinal tissue, the edge of the myocardial fiber area in the heart tissue, and the thickness of the aortic wall in the aortic tissue. Quantitative data are shown as means  $\pm$  SEM.  $n = 5$  rats per group (unpaired Student's  $t$ -test). (B) Immunostaining for a macrophage marker CD68 in the liver. Scale bar, 50  $\mu$ m. White arrows indicate CD68-positive cells. The data are shown as means  $\pm$  SEM.  $n = 5$  rats per group. Over 300 cells were quantified per individual (unpaired Student's  $t$ -test). (C) Aggresome staining in kidney and liver tissues of Y-Ctrl, O-Ctrl, O-CQ-treated rats. Scale bars, 30  $\mu$ m for kidney and liver. White arrows indicate aggresome-positive cells. Quantitative data are shown as means  $\pm$  SEM.  $n = 5$  rats per group (unpaired Student's  $t$ -test). (D) SA- $\beta$ -gal staining of kidney, liver, heart and lung tissues. Scale bars, 100  $\mu$ m for kidney, liver and lung. Quantitative data are shown as means  $\pm$  SEM.  $n = 5$  rats per group (unpaired Student's  $t$ -test).

### Figure S3. Transcriptional characterization of aging and CQ-treated rats.

(A) Heatmaps showing the distribution of rescue DEGs (green), failure to rescue DEGs (dark gray), CQ-specific DEGs (orange) and pro-aging DEGs (brown) in the six tissues including kidney, small intestine, liver, heart, lung and aorta. Each column represents one gene. Red, upregulated gene ( $\text{Log}_2\text{FC}$  [ $\log_2(\text{fold change})$ ]  $> 0.5$ , adjusted  $P$ -value  $< 0.05$ ); blue, downregulated gene ( $\text{Log}_2\text{FC} < -0.5$ , adjusted  $P$ -value  $< 0.05$ ); gray, unchanged gene ( $|\text{Log}_2\text{FC}| < 0.5$  or adjusted  $P$ -value  $> 0.05$ ). (B) Rose charts showing the numbers of aging DEGs, CQ DEGs, rescue DEGs, failure to rescue DEGs and pro-aging DEGs in the six tissues. Red indicates upregulated genes and blue indicates downregulated genes. (C) Gene set enrichment analysis (GSEA) plots showing decreased IFN response in kidney, liver, heart and aorta upon CQ treatment. (D) GSEA plots showing decreased SASP in kidney, liver and aorta upon CQ treatment. (E) GSEA plot showing decreased IL-6-JAK-STAT3 signaling in liver upon CQ treatment. (F) GSEA plot showing decreased TGF- $\beta$  signaling in liver upon CQ treatment. (G) Heatmap showing the shared genes between downregulated rescue DEGs and aging-associated genes in Aging Atlas database among the six tissues.

**Figure S4. Rescue effects and pro-aging changes at the transcriptional level upon CQ treatment.**

(A) Heatmap showing the upregulated and downregulated rescue DEGs shared by at least three tissues upon CQ treatment. (B) Representative GO terms and pathways enriched in rescue DEGs in kidney. (C) Heatmap showing changes in *Slc24a3*, *Slc17a2*, *Slc31a1* and *Slc36a4* upon CQ treatment in kidney. Red indicates upregulated, and blue indicates downregulated. (D) Heatmaps showing rescue DEGs associated with an interferon-stimulated responsive element (ISRE) and CXCR chemokine upon CQ treatment in kidney. Red indicates upregulated genes and blue indicates downregulated genes. (E) GSEA plot showing decreased chemokine receptors in kidney upon CQ treatment. (F) RT-qPCR analysis verifying the changes of top rescued DEGs in kidney. Data are shown as the means  $\pm$  SEM.  $n = 5$  rats per group (unpaired Student's  $t$ -test). (G) Representative GO terms and pathways enriched in rescue DEGs in liver. (H) Network plot showing pro-aging DEGs associated with cardiac diseases in heart. (I) RT-qPCR analysis verifying the changes of top pro-aging DEGs in heart. Data are shown as the means  $\pm$  SEM.  $n = 4-5$  rats per group (unpaired Student's  $t$ -test).



## **Supplemental Table Legends**

**Table S1. RT-qPCR primer lists.**

## References

- Anders, S., Pyl, P.T., and Huber, W. (2015). HTSeq-a Python framework to work with high-throughput sequencing data. *Bioinformatics* 31, 166-169.
- Cai, Y., Zhou, H., Zhu, Y., Sun, Q., Ji, Y., Xue, A., Wang, Y., Chen, W., Yu, X., Wang, L., et al. (2020). Elimination of senescent cells by beta-galactosidase-targeted prodrug attenuates inflammation and restores physical function in aged mice. *Cell Res* 30, 574-589.
- Campos, C.A., Bowen, A.J., Han, S., Wisse, B.E., Palmiter, R.D., and Schwartz, M.W. (2017). Cancer-induced anorexia and malaise are mediated by CGRP neurons in the parabrachial nucleus. *Nature neuroscience* 20, 934-942.
- Dodd, G.T., Andrews, Z.B., Simonds, S.E., Michael, N.J., DeVeer, M., Brüning, J.C., Spanswick, D., Cowley, M.A., and Tiganis, T. (2017). A Hypothalamic Phosphatase Switch Coordinates Energy Expenditure with Feeding. *Cell metabolism* 26, 577.
- Ma, S., Sun, S., Geng, L., Song, M., Wang, W., Ye, Y., Ji, Q., Zou, Z., Wang, S., He, X., et al. (2020). Caloric Restriction Reprograms the Single-Cell Transcriptional Landscape of *Rattus Norvegicus* Aging. *Cell* 180, 984-1001 e1022.
- Subramanian, A., Kuehn, H., Gould, J., Tamayo, P., and Mesirov, J.P. (2007). GSEA-P: a desktop application for Gene Set Enrichment Analysis. *Bioinformatics (Oxford, England)* 23, 3251-3253.
- Wu, Z., Zhang, W., Song, M., Wang, W., Wei, G., Li, W., Lei, J., Huang, Y., Sang, Y., Chan, P., et al. (2018). Differential stem cell aging kinetics in Hutchinson-Gilford progeria syndrome and Werner syndrome. *Protein & cell* 9, 333-350.
- Zhang, W., Li, J., Suzuki, K., Qu, J., Wang, P., Zhou, J., Liu, X., Ren, R., Xu, X., Ocampo, A., et al. (2015). A Werner syndrome stem cell model unveils heterochromatin alterations as a driver of human aging. *Science (New York, NY)* 348, 1160-1163.
- Zhou, Y., Zhou, B., Pache, L., Chang, M., Khodabakhshi, A.H., Tanaseichuk, O., Benner, C., and Chanda, S.K. (2019). Metascape provides a biologist-oriented resource for the analysis of systems-level datasets. *Nat Commun* 10, 1523.

**Figure S1**

**A**

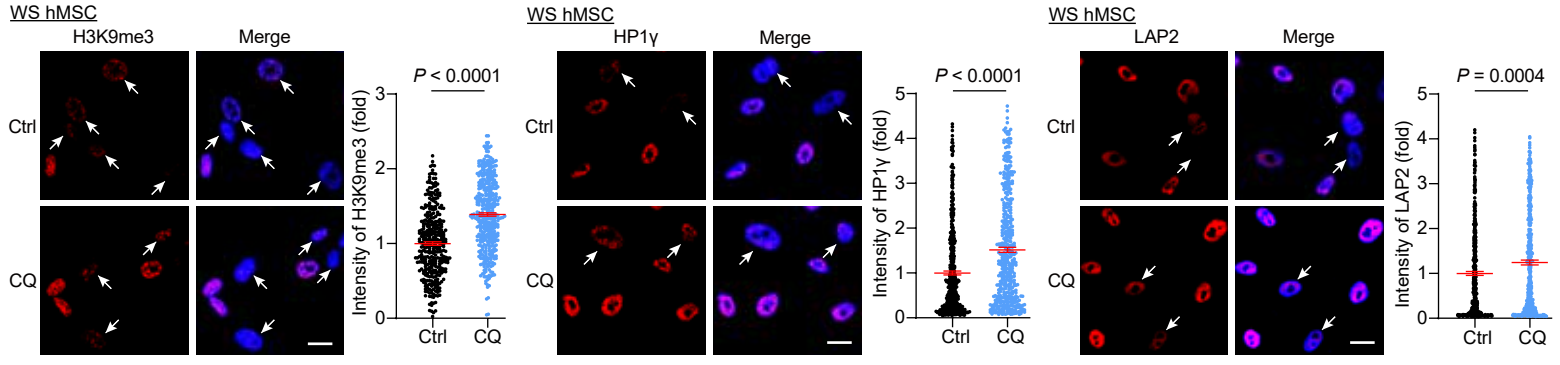

**B**

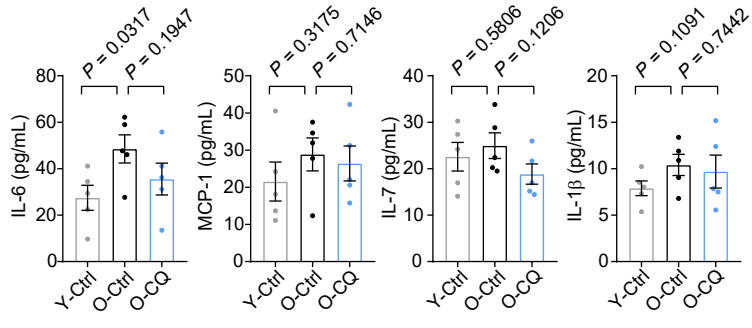

**C**

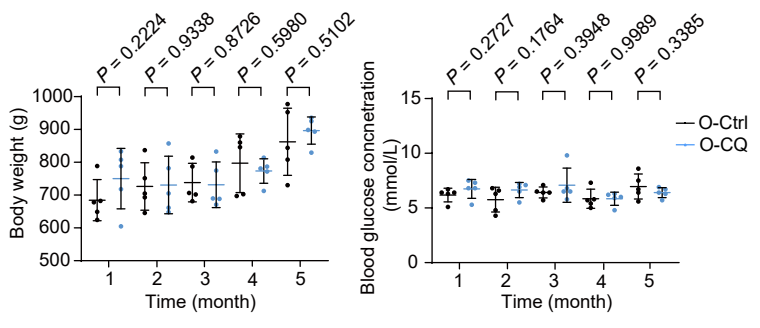

**D**

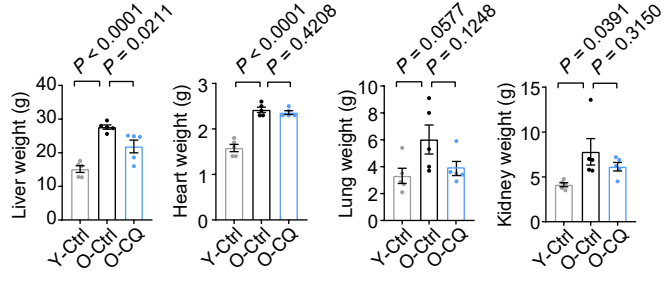

**E**

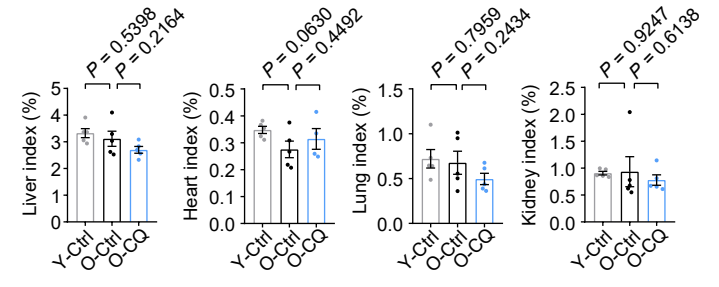

**Figure S2****A**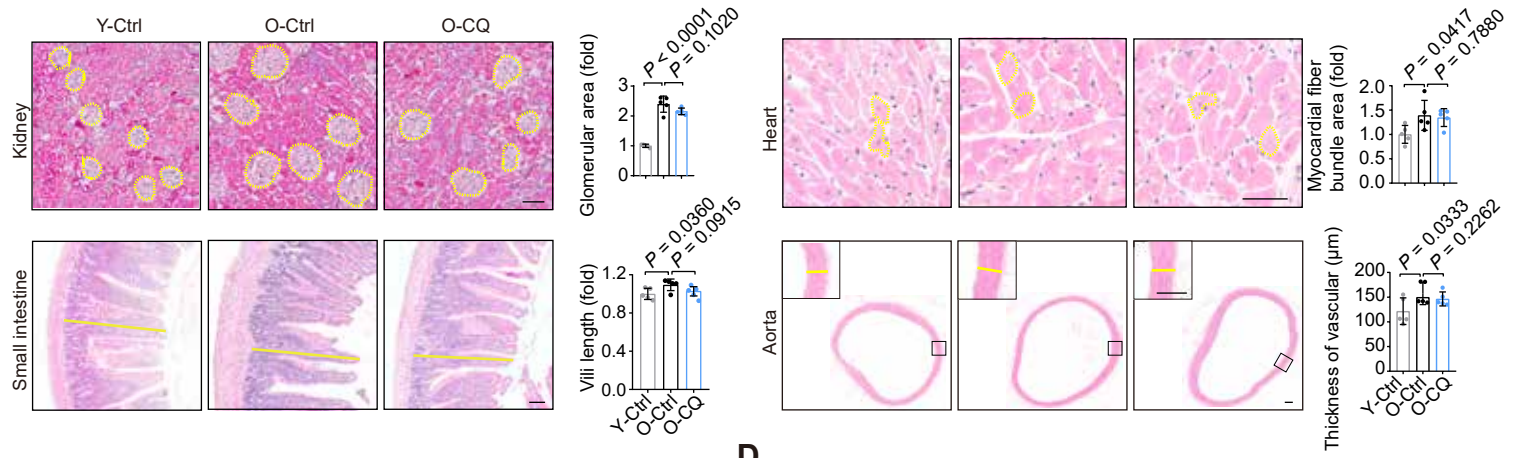**B**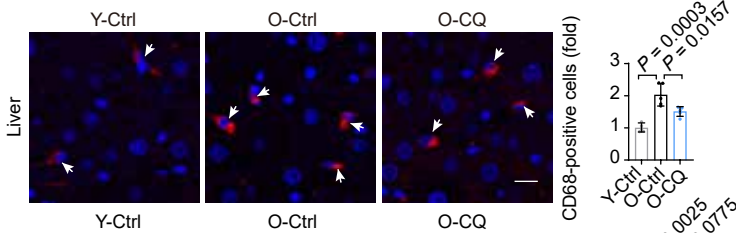**C**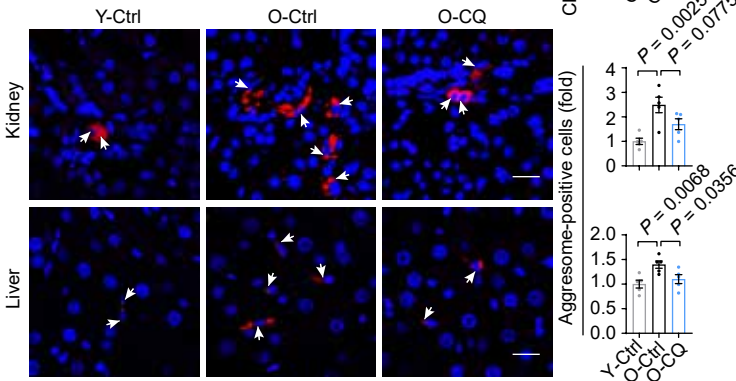**D**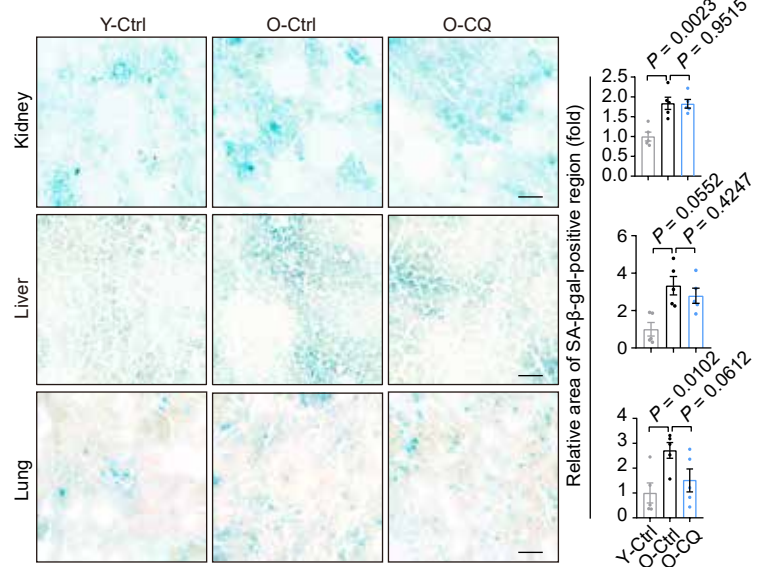

**Figure S3**

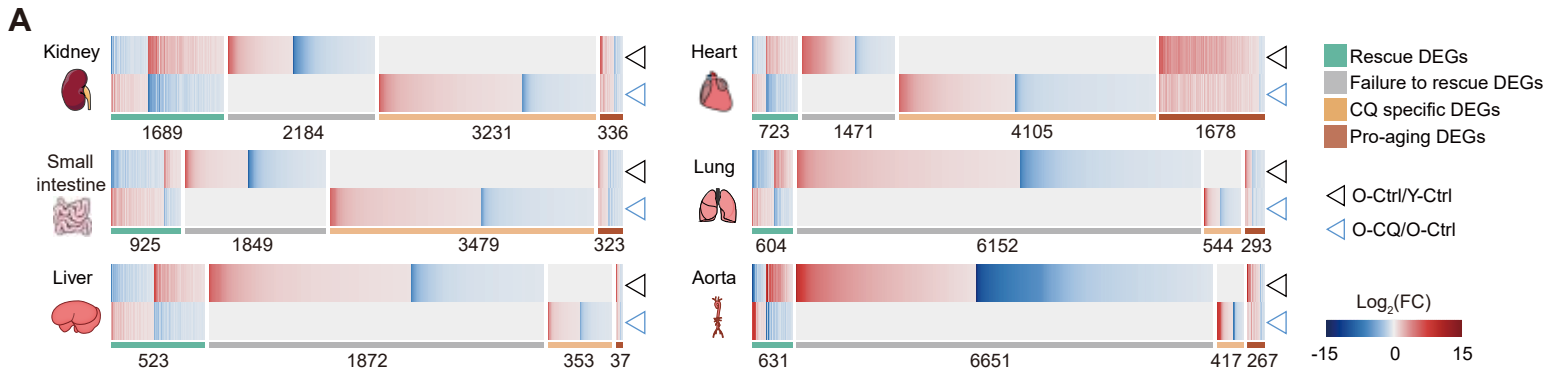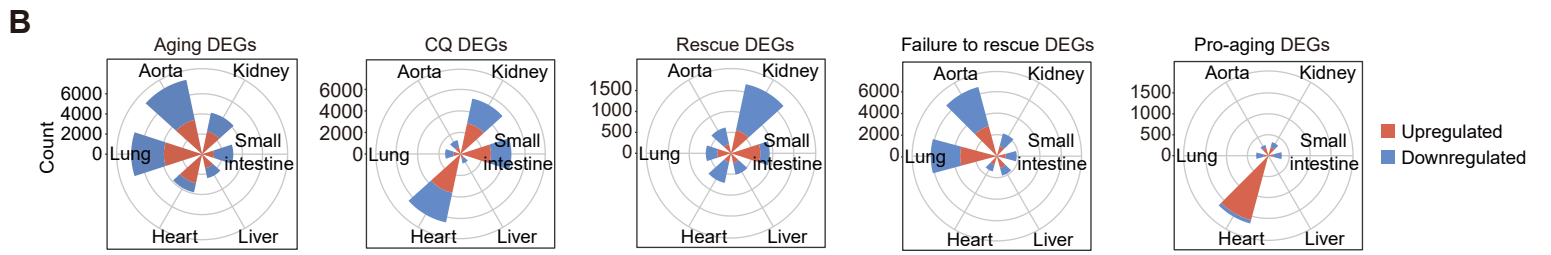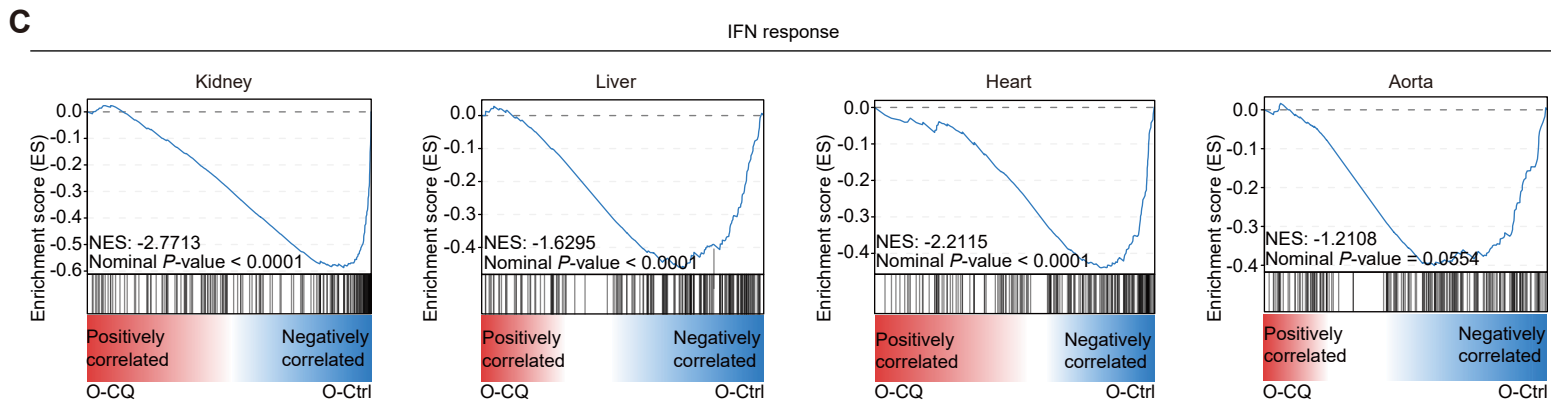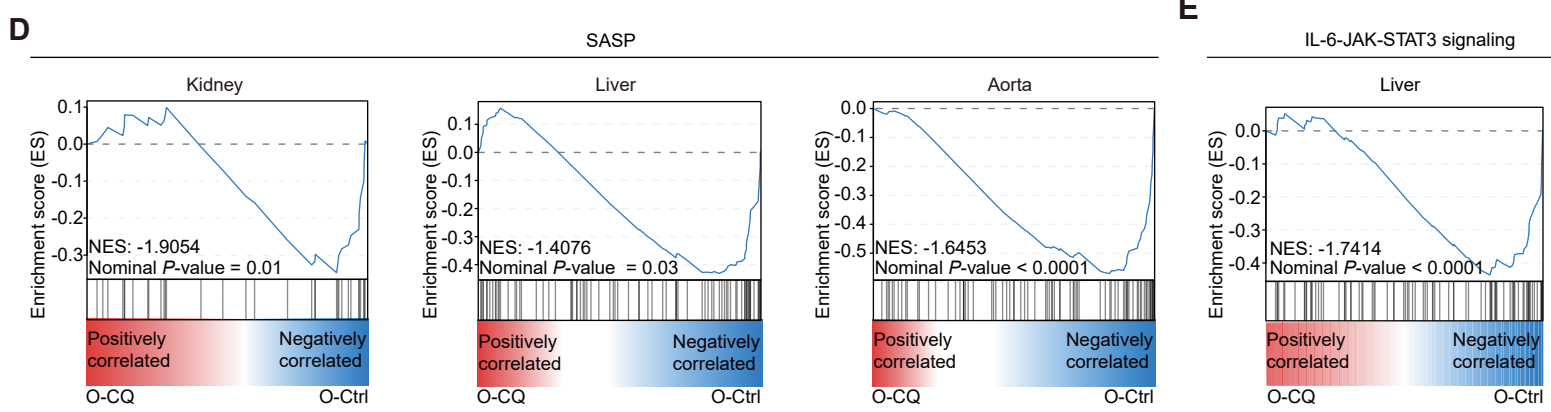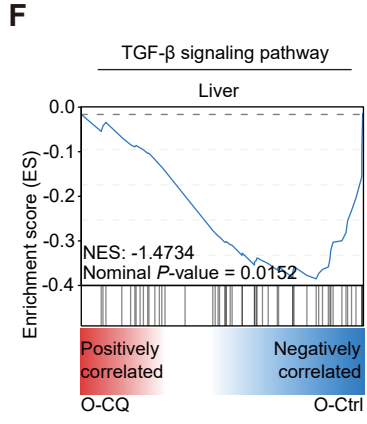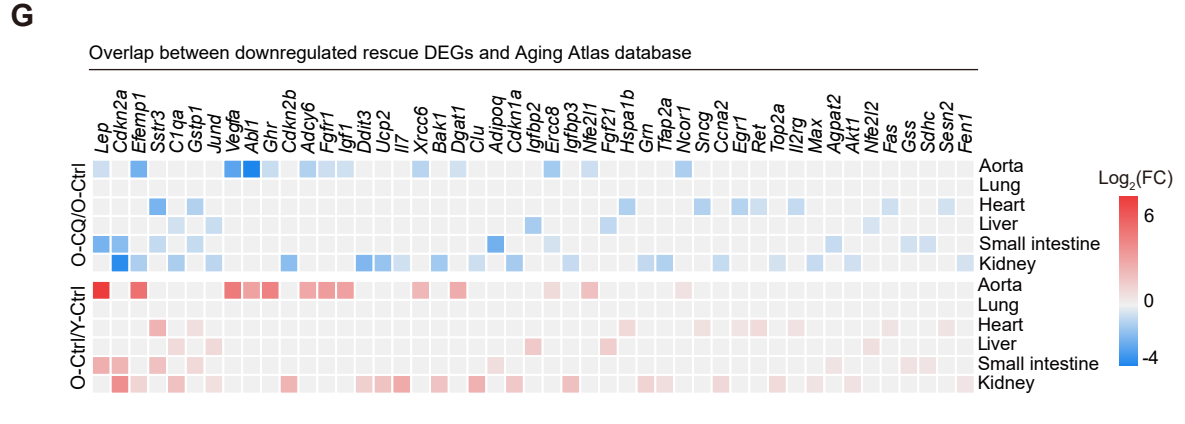

**Figure S4**

**A**

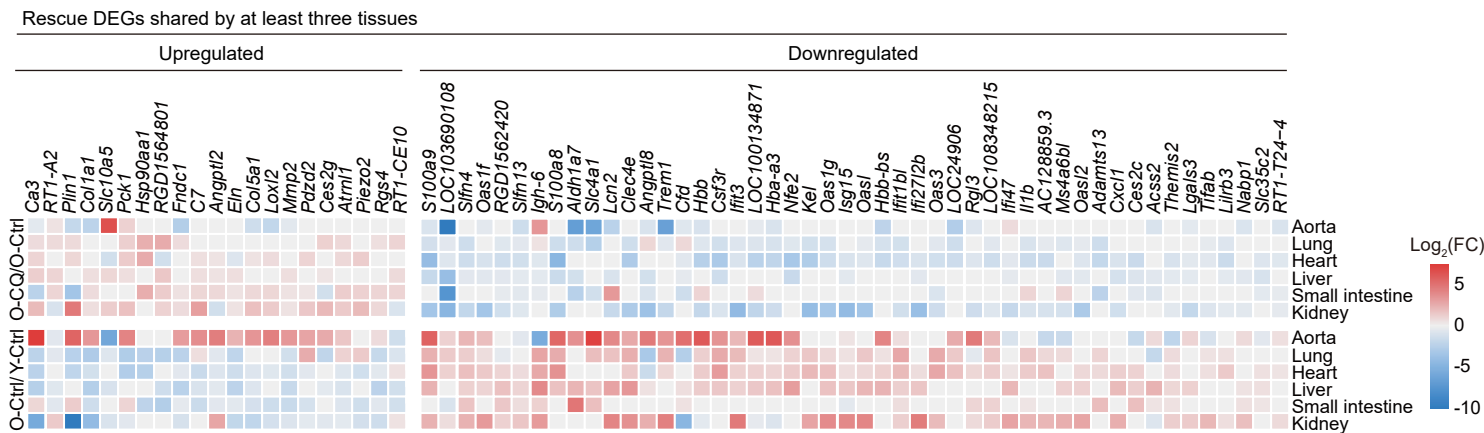

**B**

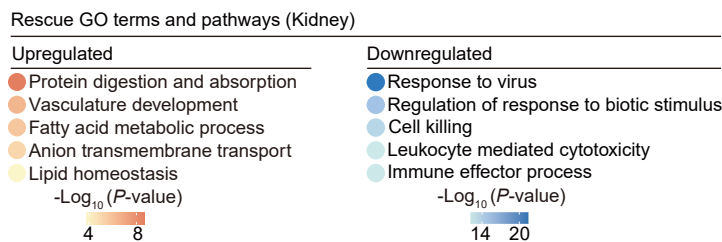

**C**

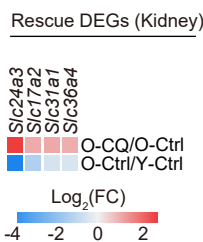

**D**

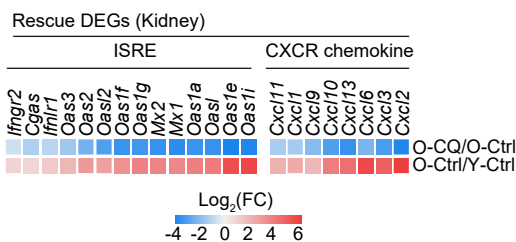

**E**

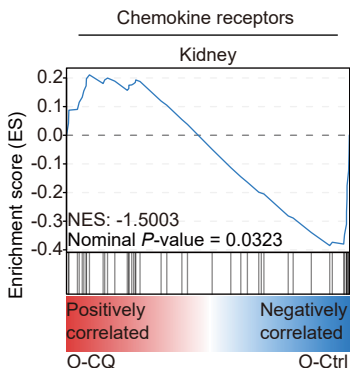

**F**

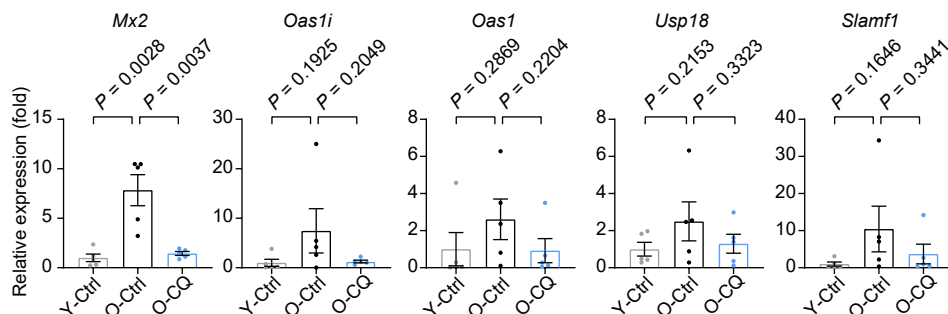

**G**

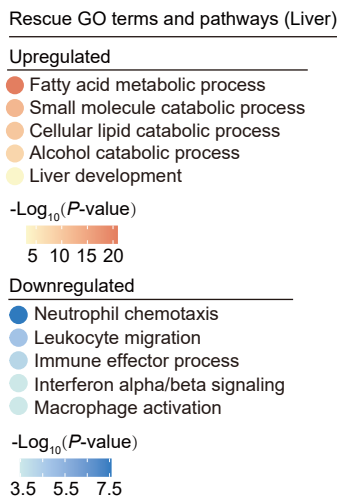

**H**

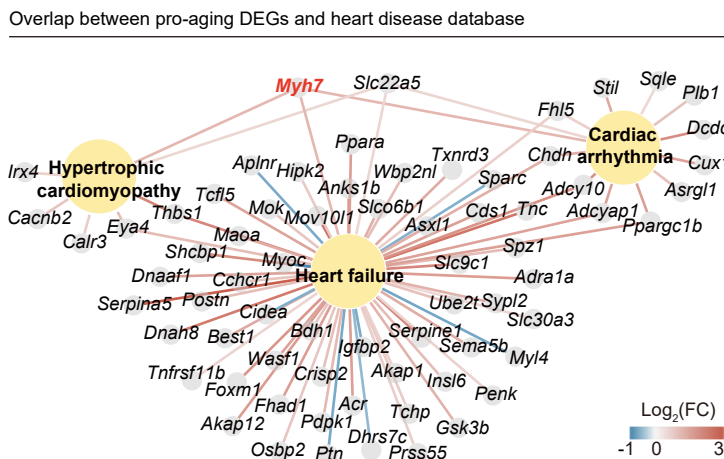

**I**

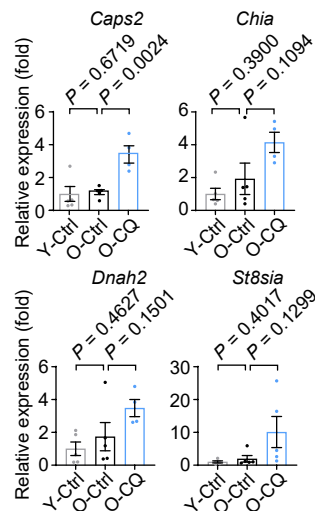

Supplement: 13238_2021_903_MOESM1_ESM.pdf [file 13238_2021_903_MOESM1_ESM.pdf]
